# Supplementary material
Source: publisher figshare collection journal article supplement (https://diabetesjournals.figshare.com/ndownloader/files/34789165)
Supplement: Supplementary file 1 [file 34789165]

## Sheet: 16A. Extended table
Table S16. Literature search on the 72 genes annotated to subgroup-unique sites included in methylation risk scores (MRSs).
Table S16A. Extended table with all the results for the 72 genes
Gene	ProbeID	MRS	Diabetes	Insulin secretion/beta-cell function	Insulin resistance	Obesity	Age	Nonalcoholic fatty liver disease (NAFLD)
A2BP1	cg02789526	SIDD-MRS	Complex congenital heart defects in association with maternal diabetes and partial deletion of the A2BP1 gene [PMID: 21355681].	no	no	Variation in A2BP1 influences obesity, and A2BP1 could potentially affect adiposity via the hypothalamic MC4R pathway [PMID: 20724578].	no	no
AATK	cg16276209	SIDD-MRS	no	Contribution of Intronic miR-338–3p and its Hosting Gene AATK to Compensatory β-Cell Mass Expansion [PMID: 25751313].	AATK expression is reduced in islets of insulin resistant animal models and selective silencing of AATK in INS832/13 cells promoted β-cell proliferation [PMID: 25751313].	no	no	no
BRE	cg16651262	SIDD-MRS	no	no	no	Variant in BRE associated with BMI in African Americans [PMID: 24094743].	no	no
C1orf167	cg02218802	SIDD-MRS	no	no	no	no	no	no
C1QL4	cg24566687	SIDD-MRS	no	no	no	no	no	no
CAB39	cg07304652	SIDD-MRS	Cab39-binding proteins may attenuate diabetic cardiomyopathy [PMID: 25362209].	no	no	Decreased of CAB39 after a high-fat diet in vivo which induced obesity and type 2 diabetes [PMID: 25362209].	no	Our result showed that Cab39 is a direct target of miRNA-451 in steatotic cells. Further study showed that AMPK activated through Cab39 inhibits NF-κB transactivation induced in steatotic HepG2 cells [PMID: 25957914].
CCDC7	cg19571645	SIDD-MRS	no	no	no	no	no	no
CELF2	cg04070007	SIDD-MRS	no	no	no	no	no	no
CPLX1	cg09635541	SIDD-MRS	no	Been implicated in glucose-induced secretion of insulin by pancreatic beta-cells [PMID: 15126625].	no	no	Expression of CPLX1 increases gradually with postnatal age (tested in 1 month to 45 years). [PMID: 20888897].	no
CTDSPL	cg04787317	SIDD-MRS	Gene with altered DNA methylation which was associated with future T2D [PMID: 32816961].	Altered DNA methylation in CTDSPL in islets after diabetes diagnosis. Epigenetic alterations of CTDSPL in murine pancreatic islets that occur in the prediabetic state with a mild hyperglycemia before β-cell failure [PMID: 32816961].	no	no	no	no
DNAJC12	cg26971256	SIDD-MRS	no	no	no	no	no	no
DPH3	cg06901492	SIDD-MRS	no	no	no	no	no	no
EBAG9	cg06955919	SIDD-MRS	no	no	no	no	no	no
ENOX1	cg05963087	SIDD-MRS	ENOX1 might be involved in Diabetic Retinopathy Development [PMID: 31662505].	no	no	Higher expression of ENOX1 after an obesogenic diet during the postnatal period in mice [PMID: 31484384].	no	no
GALT	cg03567838	SIDD-MRS	no	no	no	no	no	no
GRK5	cg05664105	SIDD-MRS	GRK5 intronic (CA)n polymorphisms associated with type 2 diabetes in Chinese Hainan Island [PMID: 24594703].	GRK5-rs10886471 was associated with higher fasting insulin (P = 0.0169) but not with fasting glucose [PMID: 22961080].	GRK5 ablation contributes to insulin resistance [PMID: 23111327].	GRK5 deficiency decreases diet-induced obesity and adipogenesis [PMID: 22507984].	Possible involvement of GRK5/RGS10 locus in age-related maculopathy [PMID: 16080115].	no
GSN	cg26649993	SIDD-MRS	Remission of T2D following bariatric procedures was associated with changes in gelsolin (GSN, p < 0.05) [PMID: 34501327].	no	It was observed a correlation between basal GSN levels and insulin resistance [PMID: 24351434].	GSN is a potential target protein in the context of obesity [PMID: 22445754]. Gsn-/- mice are prone to develop the metabolic syndrome [PMID: 29684438].	no	no
INO80D	cg01629231	SIDD-MRS	no	no	no	no	no	no
KCNAB2	cg14578612	SIDD-MRS	no	no	no	no	no	no
KCNQ2	cg25356393,cg13379325	SIDD-MRS	no	no	no	no	no	no
LMNB2	cg11447186	SIDD-MRS	13 eQTL-SNPs localized in Co-m6ARs, and 4 have been reported strongly associated with diabetes, including GAB2, LMNB2, XAB2, and RBM39. This co-expression analysis provides important information to reveal the potential regulatory mechanism of RNA m6A methylation in T2DM [PMID: 34084770].	Lamin B2 (LMNB2) can regulate fasting blood glucose by increasing insulin secretion or regenerating beta cells [PMID: 32005707].	no	no	no	no
LOC100302650	cg16651262	SIDD-MRS	no	no	no	no	no	no
LOC101929431	cg19571645	SIDD-MRS	no	no	no	no	no	no
LSP1	cg09956037	SIDD-MRS	no	no	no	no	no	no
MAST3	cg26325791	SIDD-MRS	no	no	no	Higher methylation at cg02814054 increases the risk of obesity by lowering the expression of MAST3 [PMID: 34207686].	no	A genome-wide association study of common genetic variants and liver fat replicated three known associations and identified five newly associated variants in or near the MTARC1, ADH1B, TRIB1, GPAM, and MAST3 genes (p < 3 × 10-8). A polygenic score integrating these eight genetic variants was strongly associated with future risk of chronic liver disease (hazard ratio > 1.32 per SD score, p < 9 × 1…
MIR26A1	cg04787317	SIDD-MRS	no	no	no	Obesity impaired the maturation and function of miR-26a, which has emerged as a therapeutic target in several diseases [PMID: 32165252]. Major regulator of adipocyte progenitor cells differentiation and adipose tissue mass [PMID: 31488578].	no	no
MOGAT1	cg22891868	SIDD-MRS	CpG sites annotated to MOGAT1 exhibit differential DNA methylation in liver obtained from T2D compared with nondiabetic subjects (Q < .05) [PMID: 26418287].	no	Epigenetic programming at the Mogat1 locus may link neonatal overnutrition with long-term hepatic steatosis and insulin resistance [PMID: 29812971].	MOGAT pathway (including MOGAT1) is strikingly up-regulated in obesity [PMID: 22394502].	no	The development of NAFLD was associated with overexpression of the critical fatty acid uptake and de novo lipogenesis genes Pparg, Mogat1, Cd36, Acaab1, Fabp2, and Gdf15 in male and female mice. The expression of Pparg, Mogat1, and Cd36 was positively correlated with liver triglycerides in male mice, and Mogat1 and Cd36 expression were positively correlated with liver triglycerides in female mice…
NBPF10	cg05028010	SIDD-MRS	no	no	no	no	no	no
NBPF20	cg05028010	SIDD-MRS	Differentially methylated sites at NBPF20 were significantly associated with the risk of T2D [PMID: 34214161].	no	no	no	no	no
NCLN	cg13930790	SIDD-MRS	no	no	no	no	no	no
NDUFA4L2	cg21878918	SIDD-MRS	no	no	no	no	RNA-seq analysis in mice to better understand age related cataract showed that aged fiber cells exhibit changed in the expression of mitochondrial respiratory chain genes consistent with mitochondrial stress, including upregulation of NDUFA4L2 [PMID: 34119483]	no
OXNAD1	cg06901492	SIDD-MRS	no	no	no	no	no	no
PGAM2	cg23616741	SIDD-MRS	Centrality and cluster screening identified hub-bottelneck genes, including Pgam2, for Diabetic Retinopathy rats versus healthy control [PMID: 29071030]	no			no	no
PHRF1	cg02304370	SIDD-MRS	no	no	no	no	no	no
PIP5K1C	cg07907254	SIDD-MRS	Upregulation of Pip5K1c could potentially contribute to the pericyte dysfunction in diabetes and highlighted the pattern of functional connectivity between this gene and blood retinal barrier alteration mechanisms [PMID: 32376470].	no	no	no	no	no
PITPNM3	cg17394535	SIDD-MRS	no	no	no	no	no	no
RBKS	cg16651262	SIDD-MRS	no	no	no	no	no	no
RREB1	cg05295286	SIDD-MRS	RREB1 is a potential risk gene for type 2 diabetes [PMID: 32210733]. A variant in RREB1 associated with GDM [PMID: 29947923].	Coding variant associations for glycemic traits (fasting glucose and insulin) in GWAS signals highlight RREB1 as likely effector transcripts [PMID: 25625282].	no	Loci associated with ectopic-fat traits which contributes to obesity [PMID: 27918534]. RREB1 is a potential risk gene for obesity [PMID: 32210733]	no	no
SMARCA4	cg17094383	SIDD-MRS	Myocardial Brg1 (also known as smarca4) is reduced in diabetes [PMID: 23853776].	Removal of both Swi/Snf ATPase subunits, Brg1 (also known as smarca4) and Brm, was necessary to compromise adult islet β-cell activity, which included whole-animal glucose intolerance, hyperglycemia, and impaired insulin secretion [PMID: 31201281].	no	no	Atypical teratoid/rhabdoid tumors caused by inactivating bi-allelic mutations in SMARCA4 has previously been associated with younger age [PMID: 33331994]; Inhibition of SMARCA4 was able to prevent aging-dependent dopaminergic degeneration in Drosophilia [PMID: 32749068]. Younger patients with geriatric glioblastoma had significantly more mutations in SMARCA4 than older patients [PMID: 27579614].	no
SOD3	cg23639734	SIDD-MRS	The T-allele of rs2284659 in the promoter of SOD3 was associated with a more favorable plasma redox status and with better cardiovascular outcomes in diabetic patients. Our results suggest that EC-SOD plays an important role in the mechanisms of vascular protection against diabetes-related oxidative stress [PMID: 25855220].	Gene expression profiles of biobreeding rat islets were highly distinct from healthy Fischer islets and under-expressed numerous genes involved in ROS metabolism, including superoxide dismutases (Sod2 and Sod3) which suggests β cell dysfunction in these rats [PMID: 23111281].	Global sod3 KO mice were more obese and insulin resistant with enlarged adipose tissue and increased triglyceride accumulation [PMID: 31680537].	Global sod3 KO mice were more obese and insulin resistant with enlarged adipose tissue and increased triglyceride accumulation [PMID: 31680537]. Overexpression of the Sod3 gene through gene transfer is an effective approach in preventing diet-induced obesity and obesity-associated complications [PMID: 25030609]; Significant associations were detected between human lifespan and SNPs in genes SIRT3…	Oxidative stress has been hypothesized to play a role in aging and age-related disorders. This study compared levels of oxidative stress and renal expression of oxidant and antioxidant enzymes in rats. Expressions of NADPH oxidase subunit p22(phox), SOD2 and SOD3 were markedly elevated with age in both strains [PMID: 21316443]; A study in mice suggests that wound healing impairments in ageing are…	Statistical tests showed significantly higher frequencies of -11391G/A (AA) and EC-SOD (CG+GG) in the NAFLD group (-11391G/A: P=0.0051; EC-SOD: P=0.0057) [PMID: 27241145].
SPSB4	cg15081033	SIDD-MRS	no	no	no	no	no	no
STK3	cg10944297	SIDD-MRS	no	no	no	STK3 and STK4 expression levels are elevated in human obesity, and pharmacological inhibition improves metabolic profiles in a mouse model of obesity, suggesting STK3 and STK4 as potential targets for treating obesity-related diseases [PMID: 33758424]	We demonstrate for the first time the cleavage of STK3 by caspase-7 and show that STK3 protein levels globally increase throughout the organism with age and highlight a potential role for STK3 in neurodegeneration [PMID: 27552481].	no
SYT2	cg11143857	SIDD-MRS	no	In insulin-secreting cells the use of dominant-negative mutants, recombinant proteins and knockdowns has demonstrated a role in exocytosis for syt1, syt2 and syt9, the latter being the only isoform expressed in primary β-cells [PMID: 17263688].	no	no	no	no
TXNIP	cg19693031, cg05028010	SIDD-MRS	Plasma TXNIP level is elevated in obesity patients with/without diabetes. Regulation of TXNIP could be part of the mechanism of diabetes remission after bariatric surgery [PMID: 34370159]. Two differentially methylated sites at TXNIP were significantly associated with the risk of T2D (P < 9.0×10 -8) [PMID: 34214161]. An association between TXNIP gene and T2D through epigenetic mechanisms, related…	We, hence, identified TxNIP as a common target of GABA and GLP-1 and suggest that, upon a stress challenge, the GLP-1R-cAMP-β-cat signaling cascade also mediates beneficial effects of GABA in pancreatic β-cell, involving TxNIP reduction [PMID: 32544878].	TXNIP deficient animals are protected from diet induced insulin resistance and type 2 diabetes [PMID: 28137209]. TXNIP has gained significant attention due to its wide range of functions in energy metabolism, insulin sensitivity, improved insulin secretion [PMID: 33803178].	Plasma TXNIP level is elevated in obesity patients with/without diabetes [PMID: 34370159].	TXNIP expression was upregulated in aged mouse kidneys, and this upregulation was accompanied by ageing-related renal fibrosis phenotypes. These ageing biomarkers were downregulated in TXNIP-knockout mice [PMID: 33781783]; TXNIP plays a major role in maintaining the redox status and, thereby, influences aging processes. This role of TXNIP is conserved from flies to humans. Age-dependent upregulat…	TXNIP mediates hepatic lipogenesis via PRMT1 and PGC-1α regulation and inflammation in vitro and in vivo, implying that targeting TXNIP and PRMT1 is a potential therapeutic approach for treatment of NAFLD [PMID: 25003952]. Hepatic TXNIP expression was upregulated in nonalcoholic fatty liver disease (NAFLD) patients and in methionine choline-deficient (MCD) diet-fed mice, as well as in palmitic ac…
RAB27B	cg07207090	SIRD-MRS	FOXO1-Mediated Downregulation of RAB27B Leads to Decreased Exosome Secretion in Diabetic Kidneys [PMID: 33597203]. Significant increased in gene expression of Rab27b after exposing cells to diabetic sera [PMID: 30073543].	no	no	A genome-wide study shows that a variant near this gene was associated with childhood body mass index [PMID: 26604143].	no	no
RBL2	cg00000029	SIRD-MRS	Genetic variation at the FTO locus, which is strongly associated with type 2 diabetes and obesity, influences RBL2 gene expression [PMID: 2000908].	no	no	Genetic variation at the FTO locus, which is strongly associated with type 2 diabetes and obesity, influences RBL2 gene expression [PMID: 2000908].	Rbl2/p130 expression varies with age and disease stages (P = 0.022) in patients with breast cancer [PMID: 26271034].	no
CELF6	cg27099280	MOD-MRS	no	no	no	no	no	no
CHST11	cg16618104	MOD-MRS	Using qRT-PCR, a 53.5% decrease in the expression level of Chst-11 (chondroitin 4-O sulfotransferase) was demonstrated in diabetic kidney [PMID: 23757342].	no	no	no	no	no
CMTM8	cg21548231	MOD-MRS	no	no	no	no	no	no
ELOVL2	cg24724428, cg21572722,cg16867657	MOD-MRS	Decreased expression levels of retinal fatty acid Elongases Elovl2 play an important role in the pathogenesis of diabetic retinopathy [PMID: 24736612, PMID: 19875612].	Elovl2 plays a role in glucose-induced insulin secretion [PMID: 28377873].	no	Variants in ELOVL2 were associated with BMI and affect the risk of overweight-obesity and the level of circulating fatty acids [PMID: 32843713, PMID: 32584610].	DNA methylation of ELOVL2 (three CpG sites) showed positive correlation with age in human liver [PMID: 27911095]. ELOVL2 is an epigenetic biomarkers of aging in blood [PMID: 25861810, PMID: 32721866. PMID: 28511095, PMID: 25450787, PMID: 23061750 ]. DNAm study shows that ELOVL2 5' end and intron 1 methylation increased with higher age in relation to child maltreatment [PMID: 33461631]; Using epig…	NAFLD was strongly associated with three genetic variants, TM6SF2 rs58542926, PNPLA3 rs738409 and GCKR rs1260326, and more slightly with ELOVL2 rs2236212, in obese children and adolescents [PMID: 31255630].
FAM124A	cg07430714	MOD-MRS	no	no	no	no	no	no
HRCT1	cg20868633	MOD-MRS	no	no	no	no	no	no
IFIH1 (also known as MDA5)	cg19965693	MOD-MRS	A genome-wide association study of nonsynonymous SNPs identifies a type 1 diabetes locus in the interferon-induced helicase (IFIH1) region [PMID: 16699517]. The major findings of the present study are that impaired dsRNA metabolism may lead to increased level of different sized RNAs in type 2 diabetic patients. Acting as possible DAMP molecules, they may contribute to higher susceptibility of imm…	While mice with a full complement of MDA5 show dramatic increases in pancreatic islet insulitis from the peak of infection (day 3 pi) until the initiation of diabetes (day 7 pi), MDA5+/2 mice show no increase in insulitis. This suggested that reduced MDA5 expression and function altered the ability of effector T cells to home to the pancreatic islets and destroy the pancreatic b-cells [PMID: 2559…	no	no	rs17716942 near IFIH1 were associated with age of psoriasis onset in a GWAS study [PMID: 24175098]; Mortality of anti-MDA5 autoantibody-positive dermatomyositis patients were influenced by age [PMID: 32149542]; Age is a significant predictorsfor 3-month mortality in patients with anti-MDA5 -interstitial lung disease [PMID: 31994487]; Anti-MDA5 autoantibodies are associated with older age at diagn…	These results indicated that MDA5 positively modulated the TNF-α-induced expression of CXCL10 in both STAT1-dependent and -independent manner and may be associated with metabolic inflammation in the liver [PMID: 31440940]. After adjustment for sex, albumin, PVFA and BMI, we found that three SNPs were significantly associated with advanced fibrosis, one each in PNPLA3/rs738409 (P = 0.016), ADAR-1/…
LOC100507065	cg24279897	MOD-MRS	no	no	no	no	no	no
NAV2	cg26081188	MOD-MRS	no	no	no	no	Several genetic variants withing the NAV2 gene influence the risk and age at onset of Alzheimers disease [PMID: 28778446]; Several novel SNPs were associated with age of menopause including rs10766593: NAV2 [PMID: 31188284]; The polycomb repressive complex -2 (PCRC2) target genes Kiss1r, Nav2 and Hsf4 were hypermethylated with age in mice [PMID: 23949429]	no
NEURL1B	cg06933824	MOD-MRS	no	no	no	no	no	Analysis of Time-Series Gene Expression Data to Explore Mechanisms of Chemical-Induced Hepatic Steatosis Toxicity. Among the genes deregulated by these compounds, the study highlighted OSBPL9, ALDH7A1, MYADM, SLC51B, PRDX6, GPAT3, TMEM135, DLGDA5, BCO2, APO10LA, TSPAN6, NEURL1B, and DUSP1 [PMID: 30279702 ].
NOSTRIN	cg25694915	MOD-MRS	no	no	no	no	no	no
PDGFC	cg19518666	MOD-MRS	High glucose-mediated induction of PDGF-C via ChREBP contributes to the development of glomerular mesangial expansion in diabetes, which may provide a platform for novel predictive and therapeutic strategies for diabetic nephropathy [PMID: 27033449].	no	Abnormal expression levels of PDGFC in human subcutaneous adipose tissue could be associated with increased risk of insulin resistance, type 2 diabetes, and cardiovascular disease [PMID: 31739742].	PDGFC is involved in the development of obesity and its complications [PMID: 29537219].	no	We show that both transient and stable expression of PDGF-C results in the development of liver fibrosis consisting of the deposition of collagen in a pericellular and perivenular pattern that resembles human alcoholic and nonalcoholic fatty liver disease [PMID: 15728360].
PPM1E	cg26161329	MOD-MRS	no	no	no	no	no	no
PXN	cg11826475	MOD-MRS	ROC curve and RT-PCR analysis showed that PXN might be involved in the advancement of T1D [PMID: 33827531].	These results indicate 1) that glucose-induced activation of FAK, paxillin (Pxn), and ERK1/2 is mediated by β1 integrin intracellular signaling, 2) a mechanism whereby FAK mediates glucose-induced actin cytoskeleton remodeling, hence allowing docking and fusion of insulin granules to the plasma membrane, and 3) a possible functional role for the Akt/AS160 signaling pathway in the FAK-mediated reg…	no	no	A study in C. elegans suggests that pxn-1 may function in neuronal development and age-related neuronal maintenance through pxn-2 [PMID: 26194821]	no
SCN9A	cg22872396	MOD-MRS	SCN9A Variants May be Implicated in Neuropathic Pain Associated With Diabetic Peripheral Neuropathy and Pain Severity [PMID: 25585270].		no	DNA methylation patterns at SCN9A are associated with BMI and carbohydrate intake in an adult population [PMID: 28888730]	no	no
SEMA7A	cg09300179	MOD-MRS	no	no	no	no	no	no
SLC2A13	cg18568497	MOD-MRS	Placental inositol content was 17% lower in GDM compared with non-GDM. Higher maternal mid-gestation glycemia were associated with lower placental inositol. Increasing fasting glycemia was associated with lower protein levels of the myo-inositol synthesis enzyme, IMPA1, and the inositol transporters, SLC5A11 and SLC2A13, the expression of which also correlated with placental inositol content [PMI…	no	no	no	no	no
SLC6A4 (also known as SERT)	cg14692377	MOD-MRS	Impact of serotonin transporter gene polymorphism on gut motility in patients with type 2 diabetes [PMID: 33526751]. Epigenetic adaptation of the placental serotonin transporter gene (SLC6A4) to gestational diabetes mellitus [PMID: 28650965].	SLC6A4 5HTTLPR polymorphism was significantly associated with insulin secretion (p = 0.030) and with the area under the curve of insulin blood levels during OGTT (p = 0.021) [PMID: 30123264].	Variants in this gene may play a role in glucose-stimulated insulin secretion in patients with insulin resistance and decreased insulin sensitivity [PMID: 30123264].	Altered methylation of CpG loci within SLC6A4 may provide a robust marker of adiposity across the life course [PMID: 30622309]. Significant effect of SLC6A4 5HTTLPR on change in BMI from adolescence to young adulthood [PMID: 18239643]. Differential methylation in the promoter region of the gene is associated with concurrent obesity in adults [PMID: 22290534]. (A lot of papers ponting out its asso…	no	An established mouse model of NAFLD induced by feeding a fructose-rich diet (N group) was used in the present study. N group exhibited reduced SERT protein expression (P= 0·002), which was normalised by TRP supplementation (P= 0·02) [PMID: 24708895].
TECR	cg01542019	MOD-MRS	no	no	no	no	no	no
TFEB	cg22067988	MOD-MRS	β-cell death and the development of diabetes are significantly reduced by β-cell-specific knockout of Tfeb [PMID: 33420039].	β-cell death and the development of diabetes are significantly reduced by β-cell-specific knockout of Tfeb [PMID: 33420039].	TFEB-GDF15 axis protects against obesity and insulin resistance as a lysosomal stress response [PMID: 33758420]. Mice with adipocyte-specific TFEB overexpression were protected from diet-induced obesity, insulin resistance, and metabolic sequelae [PMID: 31690633].	TFEB-GDF15 axis protects against obesity and insulin resistance as a lysosomal stress response [PMID: 33758420]. Mice with adipocyte-specific TFEB overexpression were protected from diet-induced obesity, insulin resistance, and metabolic sequelae [PMID: 31690633].	Conserved transcription factors, particularly the helix-loop-helix transcription factor TFEB and the forkhead transcription factor FOXO, control the expression of many autophagy-related genes and are important for life-span extension [PMID: 25836756, PMID: 28971552]; TFEB extends lifespan of Caenorhabditis elegans [PMID: 29273768]; TFEB protein expression is reduced in aged brains in mice implyin…	The regulation of TFEB in lipid homeostasis of non-alcoholic fatty liver disease: Molecular mechanism and promising therapeutic targets [PMID: 32057899].
TRIM59	cg07553761	MOD-MRS	no	no	no	no	3 CpG sites in the ELOVL2, KLF14 and TRIM59 genes demonstrated strong correlation between DNA methylation and age [PMID: 30300865]; Four CpG sites on TMEM51, TRIM59, ELOVL2, and EPHA6 genes showed moderate or weak correlations between methylation and age, which suggests further investigation of these markers to predict the age of bones [PMID: 32087494]; The final APM built for deceased individual…	no
CRMP1	cg07963234	MARD-MRS	no	no	no	no	In erupted molars, odontoblast-specific CRMP1 expression decreased with age [PMID: 30647493]	no
HECW1	cg02003457	MARD-MRS	no	no	no	no	no	no
LOC101927229	cg09787690	MARD-MRS	no	no	no	no	no	no
PKNOX2	cg22777186	MARD-MRS	no	no	no	no	no	no
RNF170	cg01486610	MARD-MRS	no	no	no	no	Study in mice suggest that the lack of RNF170 gene function mediates age-dependent increase of walking disabilities, characteristic for autosomal-dominant sensory ataxia [PMID: 26433933]	no

## Sheet: 16B. Summary
Table S16. Literature search on the 72 genes annotated to subgroup-unique sites included in methylation risk scores (MRSs).
Table S16B. Summary with all the results for the 72 genes.
		All	SIDD-MRS	SIRD-MRS	MOD-MRS	MARD-MRS
	Total number	72	44	2	21	5
	Associated with any of the traits	39 (54%)	23 (52%)	2 (100%)	12 (57%)	2 (40%)
		All (72 genes)	SIDD-MRS (44 genes)	SIRD-MRS (2 genes)	MOD-MRS (21 genes)	MARD-MRS (5 genes)
	Diabetes	26 (36%)	15 (24%)	2 (100%)	9 (43%)	0
	Insulin secretion	15 (21%)	10 (23%)	0	5 (24%)	0
	Insulin resistance	9 (12%)	6 (14%)	0	3 (14%)	0
	Obesity	20 (28%)	13 (29%)	2 (100%)	5 (24%)	0
	Age	16 (22%)	7 (16%)	1 (50%)	6 (29%)	2 (40%)
	NAFLD	11 (15%)	5 (11%)	0	6 (29%)	0
